# Supplementary material for: Inactivation of mrpigH Gene in Monascus ruber M7 Results in Increased Monascus Pigments and Decreased Citrinin with mrpyrG Selection Marker
Source: MDPI journal article supplement (doi:10.3390/jof7121094), 2021-12-19
Supplement: s1 [file s1]

Table S1. Primers used in RT-qPCR

| Names        | Sequences (5' → 3')    | Descriptions                          |
|--------------|------------------------|---------------------------------------|
| mrpigA qF    | CTCGAGGAATTGAGCGTTGG   | For RT-qPCR analysis of <i>mrpigA</i> |
| mrpigA qR    | CAGGAAGACTCAATTCGCCG   | (187 bp)                              |
| mrpigB qF    | CAGAAACCATCACGCAGGAG   | For RT-qPCR analysis of <i>mrpigB</i> |
| mrpigB qR    | AAAGAAGCAGCGGGTCTACT   | (246 bp)                              |
| mrpigC qF    | CCTACCCAGCAATCGATCCT   | For RT-qPCR analysis of <i>mrpigC</i> |
| mrpigC qR    | ACGTCCTTTGCTAGCTCTGT   | (169 bp)                              |
| mrpigD qF    | GTACGCGGGGAAGTTCAATC   | For RT-qPCR analysis of <i>mrpigD</i> |
| mrpigD qR    | CCCCAATATCCTCCCTCGTC   | (212 bp)                              |
| mrpigE qF    | CTGTACAACGTCCTGCATCG   | For RT-qPCR analysis of <i>mrpigE</i> |
| mrpigE qR    | TCTCCCGAATCGTATCCAGC   | (247 bp)                              |
| mrpigF qF    | GTCACGTCTCAGATCGCAAC   | For RT-qPCR analysis of <i>mrpigF</i> |
| mrpigF qR    | CTGGCACTGTCGATGAACTG   | (209 bp)                              |
| mrpigG qF    | TACAAGGAGTTCGGGCCATT   | For RT-qPCR analysis of <i>mrpigG</i> |
| mrpigG qR    | GCAGGCTAGCACACATCTTC   | (199 bp)                              |
| mrpigH qF    | TCGTCTCGTGGATCATCTCG   | For RT-qPCR analysis of <i>mrpigH</i> |
| mrpigH qR    | GATGCTCTCCAATCCCTTGC   | (197 bp)                              |
| mrpigI qF    | CATCTTGACGGGATTGCAG    | For RT-qPCR analysis of <i>mrpigI</i> |
| mrpigI qR    | ATCTCGTCCTTGCTCACACA   | (162 bp)                              |
| mrpigJ qF    | CGTTTCGGCTGATCATTCGT   | For RT-qPCR analysis of <i>mrpigJ</i> |
| mrpigJ qR    | CGATCCCGCTGAAGAACTTG   | (236 bp)                              |
| mrpigK qF    | CAATCGGACGGGAAATGACC   | For RT-qPCR analysis of <i>mrpigK</i> |
| mrpigK qR    | CTTTGAGTCTCATCGCCAGC   | (176 bp)                              |
| mrpigL qF    | TCAGGGATTGTGGGATTGCT   | For RT-qPCR analysis of <i>mrpigL</i> |
| mrpigL qR    | CTTGCAATCGCCTTGTCAACT  | (220 bp)                              |
| mrpigM qF    | GTGACTTTGAACAGCCTGGG   | For RT-qPCR analysis of <i>mrpigM</i> |
| mrpigM qR    | CGCTCAATTCCTTCTCCAGC   | (241 bp)                              |
| mrpigN qF    | CGATGCAATGGGGAGAGAGA   | For RT-qPCR analysis of <i>mrpigN</i> |
| mrpigN qR    | CGAATCCAGAGAAGGCTTGC   | (200 bp)                              |
| mrpigO qF    | AACTGCTCTTCGAGACGGAT   | For RT-qPCR analysis of <i>mrpigO</i> |
| mrpigO qR    | CGAACTCCAGCAGCAACTTC   | (168 bp)                              |
| mrpigP qF    | CTATTTGGTGCGGACGAGTG   | For RT-qPCR analysis of <i>mrpigP</i> |
| mrpigP qR    | TCCAACACCTCTTCGATGCT   | (186 bp)                              |
| Beta-actin F | TCTGGCACCACACATTCTACAA | For RT-qPCR analysis of <i>beta-</i>  |
| Beta-actin R | CGAAGACGATCTGGGTCATCT  | <i>actin</i> (120 bp)                 |
| mrl7 qF      | GAAGTGATTCTCAGCGCTGG   | For RT-qPCR analysis of <i>mrl7</i>   |
| mrl7 qR      | AGAGCGGGATCCTTGAACAA   | (215 bp)                              |
| mrl6 qF      | GCCATGCTGCCTCTTCTTTT   | For RT-qPCR analysis of <i>mrl6</i>   |
| mrl6 qR      | ACTTTGCCTTGGTGTCTTCG   | (241 bp)                              |
| mrl5 qF      | ATGTCTGCTATCCCTCCTGC   | For RT-qPCR analysis of <i>mrl5</i>   |
| mrl5 qR      | TAGAGGTAGAGCTTGGTGGC   | (242 bp)                              |

**Table S1.** Primers used in RT-qPCR

| <b>Names</b> | <b>Sequences (5'→ 3')</b> | <b>Descriptions</b>                  |
|--------------|---------------------------|--------------------------------------|
| mrl4 qF      | CGCTTGTCAAGATGGTCTCG      | For RT-qPCR analysis of <i>mrl4</i>  |
| mrl4 qR      | TCGCCCTTGTTGAAGAAAGC      | (190 bp)                             |
| mrl3 qF      | CCGAGCCAGACATGTCATTG      | For RT-qPCR analysis of <i>mrl3</i>  |
| mrl3 qR      | GATGTCTTCTTCGCGGCATT      | (217 bp)                             |
| mrl2 qF      | AGACATTCCCCTCGACGATC      | For RT-qPCR analysis of <i>mrl2</i>  |
| mrl2 qR      | GCGACAAGGTCCAACACTAC      | (165 bp)                             |
| mrl1 qF      | GTCTGATGCTGAGCCCAATG      | For RT-qPCR analysis of <i>mrl1</i>  |
| mrl1 qR      | CGGATTTGTTGGCGGTAGAG      | (246 bp)                             |
| mrpks qF     | AAGCCAATATTCAAGCGCCTG     | For RT-qPCR analysis of <i>mrpks</i> |
| mrpks qR     | GCACCAGTAACAAGCACACA      | (235 bp)                             |
| mrr1 qF      | GTCGTACCGGAAGATCGTCT      | For RT-qPCR analysis of <i>mrr1</i>  |
| mrr1 qR      | TAGTTCAGGCCTTGCATCCA      | (173 bp)                             |
| mrr2 qF      | ATGATCTGGAAGGCTACGGG      | For RT-qPCR analysis of <i>mrr2</i>  |
| mrr2 qR      | GGCACCTTGGTCTTCTCTCT      | (196 bp)                             |
| mrr3 qF      | CAGTCCAAGAACCGCTATGC      | For RT-qPCR analysis of <i>mrr3</i>  |
| mrr3 qR      | AAACTGGGATGGGAGGATGG      | (171 bp)                             |
| mrr4 qF      | GGGCACACATCCATCGATTC      | For RT-qPCR analysis of <i>mrr4</i>  |
| mrr4 qR      | GCGTCGTAGTTAAAGGCTCG      | (239 bp)                             |
| mrr5 qF      | ACATCCTTCACCCAACCGAT      | For RT-qPCR analysis of <i>mrr5</i>  |
| mrr5 qR      | TCAGTTCGGTCAGCTTCAGT      | (246 bp)                             |
| mrr6 qF      | CTTTCCTACTCCTCCGCCAA      | For RT-qPCR analysis of <i>mrr6</i>  |
| mrr6 qR      | CGAAGAAAGCGATCAGGACG      | (160 bp)                             |
| mrr7 qF      | TCGAGAAGACAGAACGTGCT      | For RT-qPCR analysis of <i>mrr7</i>  |
| mrr7 qR      | CACAAAGTCAATGCCACCCA      | (152 bp)                             |
| mrr8 qF      | CCCAAACCCGCTATTGTCAG      | For RT-qPCR analysis of <i>mrr8</i>  |
| mrr8 qR      | CCGACCGTTAAACAAGCACACA    | (158 bp)                             |
